# Supplementary material for: Synthesis of large-pore phenylene-bridged mesoporous organosilica using triblock copolymer surfactant
Source: Royal Society of Chemistry journal article supplement (doi:10.1039/b207825b), 2002-01-01
Supplement: b207825b.doc [file b207825b.doc]

# Supplementary Information
